# Supplementary material for: The Burden of Nocturnal Symptoms in Patients with Chronic Obstructive Pulmonary Disease: Results of a Real-World Survey in the USA
Source: PubMed Central journal article supplement — Pulm Ther. 2022 Jul 25;8(3):269–82. doi: 10.1007/s41030-022-00196-7 (PMC9458814; doi:10.1007/s41030-022-00196-7), 2022-07-25
Supplement: 41030_2022_196_MOESM1_ESM.pdf [file 41030_2022_196_MOESM1_ESM.pdf]

# **The Burden of Nocturnal Symptoms in Patients with Chronic Obstructive Pulmonary Disease: Results of a Real-World Survey in the USA**

## **Authors:**

Dr. Xavier Soler,<sup>1</sup> Mr. James Siddall,<sup>2</sup> Mr. Mark Small,<sup>2</sup> Dr. Marjorie Stiegler,<sup>1,3</sup> Dr. Michael Bogart<sup>1</sup>

## **Affiliations:**

<sup>1</sup>GSK, Research Triangle Park, NC, USA

<sup>2</sup>Adelphi Real World, Bollington, UK

<sup>3</sup>University of North Carolina, Chapel Hill, NC, USA

## **Corresponding author:**

Michael Bogart

Value, Evidence, and Outcomes, GSK, 5 Moore Drive, PO Box 13398, Research Triangle Park, NC, 27709-3398, USA

Tel: 1919-889-7413

Email: [mrbogart@gmail.com](mailto:mrbogart@gmail.com)

## Supplemental Information – Explanation of Outcome Variables

| Variable name                                                         | Physician or patient reported | Variable type | Nominal response type                                                                                                                                                        | Timeframe of data collection                                |
|-----------------------------------------------------------------------|-------------------------------|---------------|------------------------------------------------------------------------------------------------------------------------------------------------------------------------------|-------------------------------------------------------------|
| <i>Measures of symptom burden, frequency and impact on daily life</i> |                               |               |                                                                                                                                                                              |                                                             |
| Time of the day that a patient's COPD bothers them                    | Physician/patient             | Nominal       | 1) Daytime only<br>2) Primarily daytime with occasional night-time<br>3) Equally both day and night<br>4) Primarily night-time with occasional daytime<br>5) Night-time only | Based on physician and patient recall                       |
| Frequency of patient's symptoms on awakening                          | Physician/patient             | Nominal       | 1) Not at all<br>2) Less than once a week<br>3) Once or twice a week<br>4) 3 to 6 times a week<br>5) Every day<br>6) Don't know                                              | Based on physician and patient recall over the past 4 weeks |
| Frequency of patient's symptoms during the day                        | Physician/patient             | Nominal       | 1) Not at all<br>2) Less than once a week<br>3) Once or twice a week<br>4) 3 to 6 times a week<br>5) Every day<br>6) Don't know                                              | Based on physician and patient recall over the past 4 weeks |
| Frequency of patient's night-time symptoms                            | Physician/patient             | Nominal       | 1) Not at all<br>2) Less than once a week<br>3) Once or twice a week<br>4) 3 to 6 times a week<br>5) Every day<br>6) Don't know                                              | Based on physician and patient recall over the past 4 weeks |

| <b>Variable name</b>                                                                                               | <b>Physician or patient reported</b> | <b>Variable type</b> | <b>Nominal response type</b>                                                                                                                                                                                                                                                                                     | <b>Timeframe of data collection</b>       |
|--------------------------------------------------------------------------------------------------------------------|--------------------------------------|----------------------|------------------------------------------------------------------------------------------------------------------------------------------------------------------------------------------------------------------------------------------------------------------------------------------------------------------|-------------------------------------------|
| Impact of COPD on day-to-day activities, personal relationships, leisure, work, sleep                              | Physician/patient                    | Nominal              | 1) No impact<br>2) Rarely impacts<br>3) Occasionally impacts<br>4) Frequently impacts<br>5) Constantly impacts                                                                                                                                                                                                   | Based on physician and patient recall     |
| Jenkins Sleep Evaluation Questionnaire (JSEQ)                                                                      | Patient                              | Numeric              | 1) Have trouble falling asleep?<br>2) Wake up several times per night but did not have trouble falling asleep again?<br>3) Wake up one or more times per night (including waking far too early) and have trouble falling asleep again?<br>4) Wake up after your usual amount of sleep feeling tired or worn out? | Patient recall over past 4 weeks          |
| <b><i>Validated measures of sleep disturbance, health status and work productivity and activity impairment</i></b> |                                      |                      |                                                                                                                                                                                                                                                                                                                  |                                           |
| Jenkins Sleep Evaluation Questionnaire (JSEQ)                                                                      | Patient                              | Numeric              | 1) Have trouble falling asleep?<br>2) Wake up several times per night but did not have trouble falling asleep again?<br>3) Wake up one or more times per night (including waking far too early) and have trouble falling asleep again?<br>4) Wake up after your usual amount of sleep feeling tired or worn out? | Patient recall over past 4 weeks          |
| Work Productivity and Activity Impairment Questionnaire (WPAI)                                                     | Patient                              | Numeric              | The WPAI yields four types of scores:<br>1) Absenteeism<br>2) Presenteeism<br>3) Work productivity loss (overall work impairment/absenteeism plus presenteeism)<br>4) Activity impairment                                                                                                                        | On survey date with recall of last 7 days |

| <b>Variable name</b>                                    | <b>Physician or patient reported</b> | <b>Variable type</b> | <b>Nominal response type</b>                                                                                                                                                                                                                                                                                                                                                                                                                                                                                                                                                                                                                                                                                                                                                                                                                                               | <b>Timeframe of data collection</b> |
|---------------------------------------------------------|--------------------------------------|----------------------|----------------------------------------------------------------------------------------------------------------------------------------------------------------------------------------------------------------------------------------------------------------------------------------------------------------------------------------------------------------------------------------------------------------------------------------------------------------------------------------------------------------------------------------------------------------------------------------------------------------------------------------------------------------------------------------------------------------------------------------------------------------------------------------------------------------------------------------------------------------------------|-------------------------------------|
| EQ-5D-3L utility score                                  | Patient                              | Numeric              | 3-point rating scale on:<br>1) Mobility<br>2) Self-care<br>3) Usual activities<br>4) Pain/discomfort<br>5) Anxiety/depression                                                                                                                                                                                                                                                                                                                                                                                                                                                                                                                                                                                                                                                                                                                                              | On survey date                      |
| EQ-5D VAS                                               | Patient                              | Numeric              | N/A                                                                                                                                                                                                                                                                                                                                                                                                                                                                                                                                                                                                                                                                                                                                                                                                                                                                        | On survey date                      |
| <b><i>Physician-reported reason for drug choice</i></b> |                                      |                      |                                                                                                                                                                                                                                                                                                                                                                                                                                                                                                                                                                                                                                                                                                                                                                                                                                                                            |                                     |
| Reason for drug choice                                  | Physician                            | Nominal              | 1) Immediate onset of action<br>2) Provides sustained 24-h symptom relief<br>3) Improvement in shortness of breath<br>4) Improvement in daytime symptomatic relief<br>5) Improvement in night-time symptomatic relief<br>6) Improvement in symptomatic relief on awakening<br>7) Prevents/reduces frequency of exacerbations<br>8) Reduces need for rescue medication<br>9) Clinically relevant improvement in lung function test values<br>10) Improvement in exercise tolerance<br>11) Reduces levels of inflammation<br>12) Reduces response to allergic triggers<br>13) Penetration of drug in the lower and peripheral airways<br>14) Well-tolerated side-effect profile<br>15) Good cardiovascular profile<br>16) Avoids using high-dose inhaled steroid medications<br>17) Avoids using LABA medication<br>18) Limits the use of additional oral steroid medication | On survey date                      |

| <b>Variable name</b>                                                             | <b>Physician or patient reported</b> | <b>Variable type</b> | <b>Nominal response type</b>                                                                                                                                                                                                                                                                                                                           | <b>Timeframe of data collection</b>           |
|----------------------------------------------------------------------------------|--------------------------------------|----------------------|--------------------------------------------------------------------------------------------------------------------------------------------------------------------------------------------------------------------------------------------------------------------------------------------------------------------------------------------------------|-----------------------------------------------|
|                                                                                  |                                      |                      | 19) Maximizes patient compliance<br>20) Ease of use/suitability of inhaler device<br>21) Once-daily dosing<br>22) Acts as both a reliever and as maintenance therapy<br>23) Option to upward or downward titrate when required<br>24) Drug familiarity and personal experience<br>25) In accordance with clinical guidelines<br>26) Request by patient |                                               |
| <b><i>Physician-reported reason for drug choice and drug dosing schedule</i></b> |                                      |                      |                                                                                                                                                                                                                                                                                                                                                        |                                               |
| Reason for drug choice                                                           | Physician                            | Nominal              | See above                                                                                                                                                                                                                                                                                                                                              | On survey date                                |
| Frequency of maintenance daily dosing (drug level)                               | Physician                            | Nominal              | 1) Once-daily<br>2) Twice-daily                                                                                                                                                                                                                                                                                                                        | On survey date from available medical records |
| Time of day of dosing                                                            | Patient                              | Nominal              | 1) As soon as I wake up<br>2) During the morning<br>3) At lunchtime<br>4) During the afternoon<br>5) During the evening<br>6) Just before I go to bed<br>7) During the night                                                                                                                                                                           | On survey date                                |
| Frequency of maintenance daily dosing                                            | Patient                              | Nominal              | Frequency count of option above                                                                                                                                                                                                                                                                                                                        | On survey date                                |

| <b>Variable name</b>                                 | <b>Physician or patient reported</b> | <b>Variable type</b> | <b>Nominal response type</b>                                                                                                                             | <b>Timeframe of data collection</b> |
|------------------------------------------------------|--------------------------------------|----------------------|----------------------------------------------------------------------------------------------------------------------------------------------------------|-------------------------------------|
| <b><i>Patient demographics and comorbidities</i></b> |                                      |                      |                                                                                                                                                          |                                     |
| Physician setting                                    | Physician                            | Nominal              | 1) PCP<br>2) Pulmonologist/respiratory specialist                                                                                                        | On survey date                      |
| Age (year)                                           | Physician                            | Numeric              | N/A                                                                                                                                                      | On survey date                      |
| Sex                                                  | Physician                            | Nominal              | 1) Male<br>2) Female                                                                                                                                     | On survey date                      |
| Body mass index (BMI) (kg/m <sup>2</sup> )           | Physician                            | Numeric and nominal  | 1) <18.5<br>2) 18.5–24.9<br>3) 25.0–26.9<br>4) 27.0–29.9<br>5) 30+                                                                                       | Based on available medical records  |
| Employment status                                    | Physician                            | Nominal              | 1) Working full-time<br>2) Working part-time<br>3) On long-term sick leave<br>4) Homemaker<br>5) Student<br>6) Retired<br>7) Unemployed<br>8) Don't know | On survey date                      |
| Unemployed/retired/sick leave due to COPD            | Physician                            | Nominal              | 1) Yes<br>2) No<br>3) Don't know                                                                                                                         | On survey date                      |

| <b>Variable name</b>             | <b>Physician or patient reported</b> | <b>Variable type</b> | <b>Nominal response type</b>                                                                 | <b>Timeframe of data collection</b> |
|----------------------------------|--------------------------------------|----------------------|----------------------------------------------------------------------------------------------|-------------------------------------|
| Smoking status (tobacco)         | Physician                            | Nominal              | 1) Current smoker<br>2) Ex-smoker<br>3) Never smoked<br>4) Don't know                        | Based on available medical records  |
| Caregiver status                 | Physician                            | Nominal              | Whether anyone is responsible for patient's daily needs:<br>1) Yes<br>2) No<br>3) Don't know | Based on available medical records  |
| Current comorbidities            | Physician                            | Nominal              | Pre-coded list of current comorbidities                                                      | Based on available medical records  |
| Charlson Comorbidity Index (CCI) | Physician                            | Numeric              | Calculated score based on selected current comorbidities                                     | Based on available medical records  |

*COPD* chronic obstructive pulmonary disease; *EQ-5D(-3L)* EuroQoL 5-Dimension (3-Level); *LABA* long-acting  $\beta$ 2 agonist; *N/A* not applicable;

*PCP* primary care physician; *VAS* Visual Analog Scale
